# Supplementary material
Source: MDPI journal article supplement (https://www.mdpi.com/2071-1050/13/15/8471)
Supplement: s1 [file s1]

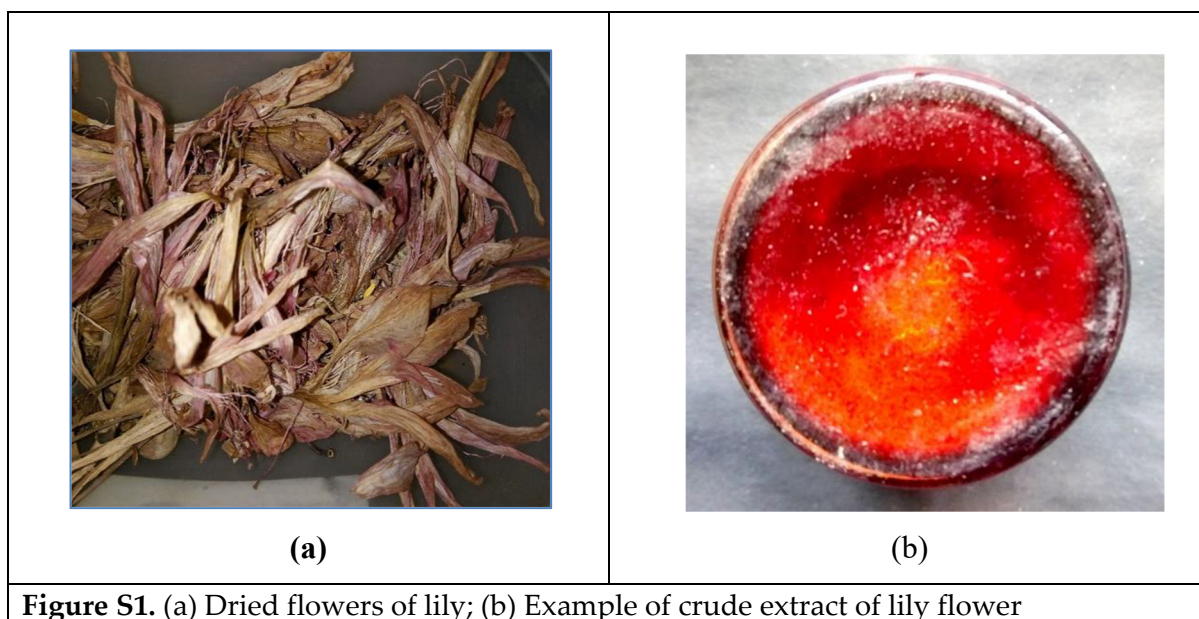

**Table S1.** Antimicrobial activity of the extracts of *L. philadelphicum* tested against different microorganisms: Zone of Inhibition obtained using various solvent extracts

| S.no. | Microbe                                | Zone of inhibition ( in mm) |         |            |        |
|-------|----------------------------------------|-----------------------------|---------|------------|--------|
|       |                                        | Methanol                    | Aqueous | Chloroform | Hexane |
| 1.    | <i>Candida albicans</i> MTCC 183       | 15                          | 10      | -          | -      |
| 2.    | <i>Salmonella typhi</i> MTCC 537       | 10                          | -       | -          | -      |
| 3.    | <i>Acinetobacter bouvetii</i>          | 14                          | 11      | 12         | 10     |
| 4.    | <i>Bacillus subtilis</i> MTCC 121      | 15                          | 11      | -          | -      |
| 5.    | <i>Klebsiella pneumoniae</i> MTCC 3384 | 13                          | 11      | 10         | -      |
| 6.    | <i>Achromobacter xylosoxidans</i>      | 16                          | -       | 11         | 10     |
| 7.    | <i>Staphylococcus aureus</i> MTCC 902  | -                           | -       | -          | 10     |
| 8.    | <i>Escherichia coli</i> MTCC1304       | -                           | -       | -          | -      |
| 9.    | <i>Bacillus pumilus</i> MTCC1607       | -                           | 12      | -          | -      |

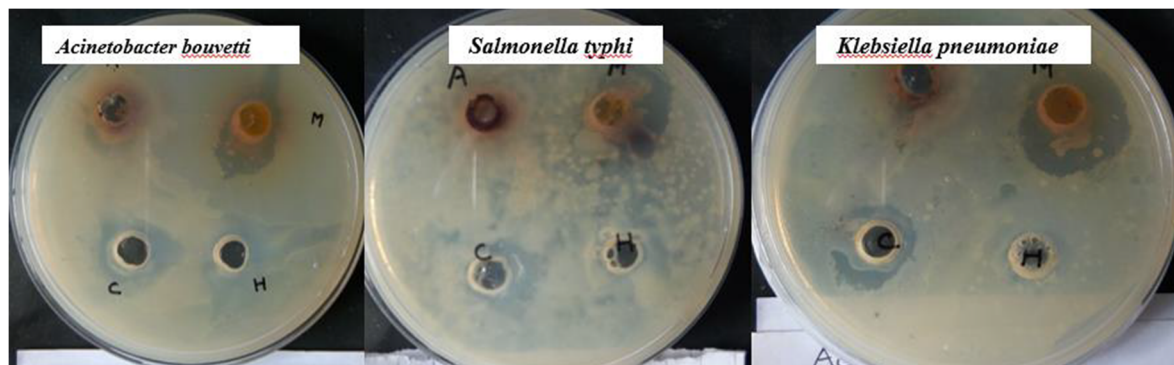

**Figure S2.** Some examples of Zone of Inhibition (ZOI) obtained from various solvents (methanol/hexane/aqueous/chloroform) extract of flower

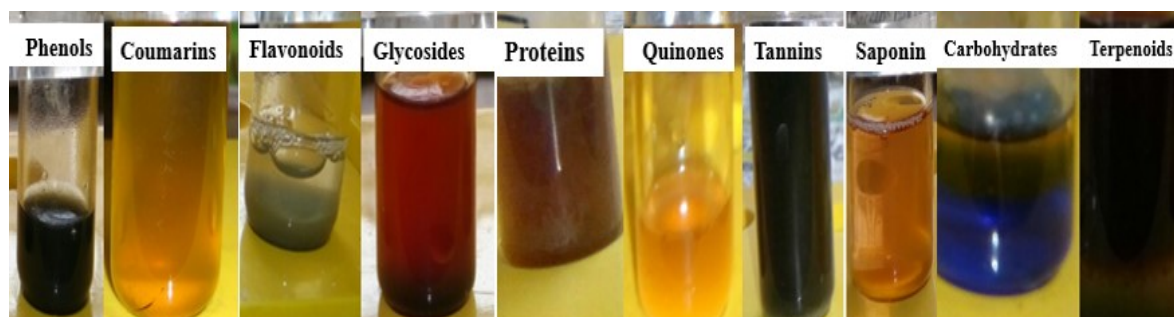

**Figure S3.** Phytochemical analysis of methanolic extract of red lily
